# Supplementary material for: Transcriptome and Metabolomic Analyses Reveal Regulatory Networks Controlling Maize Stomatal Development in Response to Blue Light
Source: MDPI journal article supplement (doi:10.3390/ijms22105393), 2021-05-20
Supplement: s1 [file s1]

| Gene ID      | group | state | Gene description strived from NCBI                                                    |
|--------------|-------|-------|---------------------------------------------------------------------------------------|
| dhs2         | B     | up    | deoxyhypusine synthase 2                                                              |
| IDP1436      | B     | up    | 4-coumarate--CoA ligase-like 9                                                        |
| LOC100281746 | B     | up    | glycerol 3-phosphate permease                                                         |
| LOC100285616 | B     | down  | calcineurin B-like protein 4                                                          |
| LOC103626304 | B     | up    | protein ACTIVITY OF BC1 COMPLEX KINASE 7                                              |
| LOC103646055 | B     | down  | cytochrome P450 87A3-like                                                             |
| LOC103648196 | B     | down  | putative glutaredoxin-C14                                                             |
| pco105718    | B     | up    | Serine/threonine-protein phosphatase                                                  |
| PPCK1        | B     | up    | phosphoenolpyruvate carboxylase kinase 1                                              |
| umc1774      | B     | down  | starch phosphorylase1                                                                 |
| LOC100280217 | C     | up    | uncharacterized                                                                       |
| LOC103630810 | C     | up    | RNA polymerase sigma factor sigE                                                      |
| LOC103636244 | C     | up    | protein SPA1-RELATED 4                                                                |
| LOC100191429 | D     | up    | putative MAP kinase family protein                                                    |
| LOC100279221 | D     | up    | Protein phosphatase 2C and cyclic nucleotide-binding/kinase domain-containing protein |
| LOC100285849 | D     | up    | uncharacterized                                                                       |
| LOC103635843 | D     | up    | CBL-interacting protein kinase 19                                                     |
| pco153236    | D     | up    | Glycogen synthase kinase-3 MsK-3                                                      |
| TIDP9234     | D     | down  | CBL-interacting kinase                                                                |
| LOC100286321 | E     | up    | copper transporter 1                                                                  |
| LOC100304064 | E     | down  | SAUR33                                                                                |
| LOC107548106 | E     | down  | SAUR33                                                                                |
| dhn1         | F     | up    | dehydrin DHN1                                                                         |
| LOC103641704 | F     | up    | zeaxanthin epoxidase, chloroplastic                                                   |
| LOC103645618 | F     | up    | carotenoid 9,10(9',10')-cleavage dioxygenase                                          |
| LOC103649550 | F     | up    | S-type anion channel SLAH3                                                            |
| LOC103651474 | F     | down  | S-type anion channel SLAH2                                                            |
| wcl          | F     | up    | white cap1                                                                            |
