# Supplementary material for: Transcriptome and Metabolomic Analyses Reveal Regulatory Networks Controlling Maize Stomatal Development in Response to Blue Light
Source: MDPI journal article supplement (doi:10.3390/ijms22105393), 2021-05-20
Supplement: s1 [file s1]

| Gene Symbol         | Forward primer (5' to 3') | Reverse primer (5' to 3') |
|---------------------|---------------------------|---------------------------|
| <i>ZmCRY1</i>       | GTTCAACCTGCTATCCACG       | AGTTCGGTCTCAGCTCTAA       |
| <i>ZmCRY2</i>       | TGAGAGTGACGCACTAGG        | GTGCGGATCAAACCTGTACC      |
| <i>ZmPhyA1</i>      | ACTGCAAACAAGTGCCAA        | GCATTTCCCATTTCTCCGC       |
| <i>ZmPhyB1</i>      | GTACACAGGCGGCAAATG        | CATGGACTCTGATCTTGAAACC    |
| <i>ZmPhyB2</i>      | ATGGTTGTCATTCAATGCTA      | CCTGCACATACTTTCCATTCTT    |
| <i>ZmSTOMAGEN</i>   | ATGCCTAGCTCAGGTTATGGA     | GGCCATTCATACTTTCAGATGT    |
| <i>ZmEPF2</i>       | AGGTAGCACTACTTGAACCTT     | TTCCGAACCACCGTGATT        |
| <i>ZmCOP1</i>       | CGCGTGTATGTCGTACTG        | AATTCATGCCCTAACCGGA       |
| <i>ZmPIF4</i>       | TCTCCTTCCTTCCGAACG        | ATGCAGCTAGATGACCCA        |
| <i>ZmHY5</i>        | CAAGAGCTAATGAGAATTGAGGGAC | CCAACAATGGTCAGGTGAGGC     |
| <i>ZmTMM</i>        | AACTCCGGTGGCGGTACTC       | GCAAGGTGCAGACACACGAA      |
| <i>ZmER</i>         | GTCCCTACTGACAACAACCTC     | ACCAAGCCAATATCCACAGA      |
| <i>ZmERL1</i>       | ACTGGAGATGTCTCTTCACT      | TACCCAAGAAGCTGTCGG        |
| <i>ZmERL2</i>       | TTAGGCTTCGTCATATTGCTCT    | GTCGGATGCTTTCTCAGGTA      |
| <i>ZmYDA</i>        | CCATTGAGCATCGCTCAC        | GGACTTGATGGATTCTCTGTTC    |
| <i>ZmMKK4</i>       | ATGTTCGCCATCTGCTAC        | CAGAGGCTGATGAAGTTCTTG     |
| <i>ZmMPK3</i>       | CTGTTCTGCTTGCTGCTGA       | GCTGTGGCTGCCTTATTAT       |
| <i>ZmPAN1</i>       | GGTGCAATCCAACGCATAA       | ACCGTCTCTGAAATCCACA       |
| <i>ZmPAN2</i>       | CTACCTAAACCTTTCCCGCA      | TCAGATCAAGCACGGTAAGT      |
| <i>ZmPOLAR</i>      | CTACCGGGATGGAGTTGAT       | GAGCCTTCTCTCCAAGTGT       |
| <i>ZmSPCH</i>       | GCAGGCCAAATTCGTTACTATCTAC | GTGGCCTCTGCATCTTGAGATAA   |
| <i>ZmMUTE</i>       | AGTGTTGAGGATCTTGCCTACGA   | CTCCTCCTGCGGCTTCTG        |
| <i>ZmFAMA</i>       | GCTGATCAAGACCATCGC        | TTGAAGGAGTAGAGGACGG       |
| <i>ZmCDKB1-1</i>    | CGTCCCTGTAAAGAAGTACAC     | CTGCACAAACAATTCAGACTC     |
| <i>ZmCYCD4-1</i>    | TCTGAATGCAGGGTGCTAGTA     | CTGCCTTTAGTTTGGTCGT       |
| <i>ZmCyclin-A2</i>  | GAGGGAGTTCACTTGTGGA       | TCTGCTTCTCTTTCTGTGCC      |
| <i>LOC107326007</i> | CAGCGCGGCCAATAATAGA       | ACACTTGCTGTAATTTATGCAC    |
| <i>LOC100192073</i> | GTTCTTGTTGGTTTGGTTTTCTG   | GTGAACCGGGCTCCCAT         |
| <i>LOC100285849</i> | CTGTTGGAGCCAGCCTTACAC     | CGAAGCAACAACGGAACTTTA     |
| <i>LOC100280217</i> | TTCTTGACTCGCGGTGATATGT    | TGCAGGCGACTTGACGATT       |
| <i>LOC100281912</i> | TCCCGGCCGTAAAAATATGTA     | TGAAGCAGCCATTTTACTGGTGTA  |
| <i>LOC107403167</i> | ACATGATGGCATTTAGCAACTGA   | ATGTACTCCACCGGCCATTG      |
| <i>LOC103641704</i> | ACCAGTCACCATCCCATCATC     | GGAGTATCGTGTATCTCCCGATTG  |
| <i>umc1774</i>      | AGGCGTACCGAGATCAGAAGTT    | GATGAGCCAGCCGTGTTGA       |
| <i>ZmGAPDH</i>      | TATGTCCTTCCGTGTTCTAC      | AGCAGCCTTAATAGCTTTCTT     |
