# Supplementary material for: Transcriptome and Metabolomic Analyses Reveal Regulatory Networks Controlling Maize Stomatal Development in Response to Blue Light
Source: MDPI journal article supplement (doi:10.3390/ijms22105393), 2021-05-20
Supplement: s1 [file s1]

| Sample | Raw reads | Raw bases | Clean reads | Clean bases | Valid bases | Q30     | GC      |
|--------|-----------|-----------|-------------|-------------|-------------|---------|---------|
| Blue1  | 57.27 M   | 8.59 G    | 55.94 M     | 7.91 G      | 92.10 %     | 94.03 % | 56.23 % |
| Blue2  | 53.26 M   | 7.99 G    | 52.03 M     | 7.35 G      | 91.96 %     | 94.05 % | 56.81 % |
| Blue3  | 57.36 M   | 8.60 G    | 56.04 M     | 7.95 G      | 92.40 %     | 93.92 % | 56.61 % |
| Red1   | 51.32 M   | 7.70 G    | 50.16 M     | 7.08 G      | 91.98 %     | 94.00 % | 56.78 % |
| Red2   | 53.05 M   | 7.96 G    | 51.86 M     | 7.36 G      | 92.51 %     | 94.13 % | 56.51 % |
| Red3   | 58.91 M   | 8.84 G    | 57.55 M     | 8.18 G      | 92.52 %     | 93.92 % | 56.59 % |
