# Supplementary material for: Transcriptome and Metabolomic Analyses Reveal Regulatory Networks Controlling Maize Stomatal Development in Response to Blue Light
Source: MDPI journal article supplement (doi:10.3390/ijms22105393), 2021-05-20
Supplement: s1 [file s1]

| NO. | Genes ID     | type | KEGG classification                             | Enrichment term                                                                                       | Gene description or functional annotation                                         |
|-----|--------------|------|-------------------------------------------------|-------------------------------------------------------------------------------------------------------|-----------------------------------------------------------------------------------|
| 1   | bZIP107      | up   | Signal transduction                             | Plant hormone signal transduction                                                                     | Putative bZIP transcription factor superfamily protein; Transcription factor TGA4 |
| 2   | gpm254       | up   | Environmental adaptation                        | Circadian rhythm - plant                                                                              | Transcription factor HY5; Uncharacterized                                         |
| 3   | gpm827       | up   | Signal transduction                             | Inositol phosphate metabolism<br>Phosphatidylinositol signaling system<br>Endocytosis                 | Putative phosphatidylinositol-4-phosphate 5-kinase family protein                 |
| 4   | gpm849       | down | Environmental adaptation                        | Circadian rhythm - plant                                                                              | Phosphatidylethanolamine-binding protein26; ZCN26                                 |
| 5   | IDP491       | down | Signal transduction<br>Environmental adaptation | Plant-pathogen interaction<br>MAPK signaling pathway - plant                                          | Respiratory burst oxidase homolog protein B                                       |
| 6   | LOC100192868 | up   | Environmental adaptation                        | Circadian rhythm - plant                                                                              | LHY protein                                                                       |
| 7   | LOC100217045 | down | Signal transduction                             | Plant hormone signal transduction                                                                     | Histidine-containing phosphotransfer protein 4                                    |
| 8   | LOC100273422 | up   | Environmental adaptation                        | Plant-pathogen interaction                                                                            | putative protein kinase superfamily protein                                       |
| 9   | LOC100273598 | up   | Environmental adaptation                        | Circadian rhythm - plant                                                                              | Two-component response regulator-like APRR9                                       |
| 10  | LOC100274454 | down | Signal transduction                             | MAPK signaling pathway - plant                                                                        | ETHYLENE INSENSITIVE 3-like 5 protein                                             |
| 11  | LOC100279342 | up   | Environmental adaptation                        | Circadian rhythm - plant<br>Ubiquitin mediated proteolysis                                            | E3 ubiquitin-protein ligase COP1                                                  |
| 12  | LOC100279578 | up   | Signal transduction                             | Plant hormone signal transduction<br>MAPK signaling pathway - plant                                   | PP2C11; 2C-type protein phosphatase protein                                       |
| 13  | LOC100280135 | up   | Signal transduction                             | Amino sugar and nucleotide sugar metabolism<br>MAPK signaling pathway - plant                         | Basic endochitinase B                                                             |
| 14  | LOC100280474 | down | Signal transduction                             | Plant hormone signal transduction                                                                     | SAUR25 - auxin-responsive SAUR family member                                      |
| 15  | LOC100281007 | up   | Signal transduction                             | Plant hormone signal transduction                                                                     | SAUR14 - auxin-responsive SAUR family member                                      |
| 16  | LOC100281015 | up   | Signal transduction<br>Environmental adaptation | Phosphatidylinositol signaling system<br>MAPK signaling pathway - plant<br>Plant-pathogen interaction | caltractin                                                                        |
| 17  | LOC100281091 | up   | Environmental adaptation                        | Circadian rhythm - plant                                                                              | Circadian clock associated1; Putative MYB DNA-binding domain superfamily protein  |

|    |              |      |                          |                                   |                                                             |
|----|--------------|------|--------------------------|-----------------------------------|-------------------------------------------------------------|
| 18 | LOC100281845 | up   | Signal transduction      | Plant hormone signal transduction | SAUR25 - auxin-responsive SAUR family member                |
| 19 | LOC100281912 | up   | Signal transduction      | Plant hormone signal transduction | Uncharacterized                                             |
| 20 | LOC100283359 | down | Signal transduction      | Plant hormone signal transduction | two-component response regulator ARR3                       |
| 21 | LOC100283515 | down | Environmental adaptation | Plant-pathogen interaction        | caltractin                                                  |
| 22 | LOC100286122 | up   | Environmental adaptation | Ubiquitin mediated proteolysis    | ubiquitin ligase protein COP1                               |
|    |              |      |                          | Circadian rhythm - plant          |                                                             |
| 23 | LOC100381449 | up   | Signal transduction      | Plant hormone signal transduction | SAUR-like auxin-responsive protein family                   |
| 24 | LOC103627330 | up   | Signal transduction      | Plant hormone signal transduction | ETHYLENE INSENSITIVE 3-like 5 protein                       |
|    |              |      |                          | MAPK signaling pathway - plant    |                                                             |
| 25 | LOC103627479 | up   | Signal transduction      | Plant hormone signal transduction | SAUR11-auxin-responsive SAUR family member                  |
| 26 | LOC103630348 | up   | Signal transduction      | Plant hormone signal transduction | gibberellin receptor GID1-like                              |
| 27 | LOC103631918 | down | Signal transduction      | MAPK signaling pathway – plant    | auxin-responsive protein SAUR41                             |
|    |              |      | Environmental adaptation | Plant hormone signal transduction |                                                             |
|    |              |      |                          | Plant-pathogen interaction        |                                                             |
| 28 | LOC103632809 | down | Signal transduction      | Plant hormone signal transduction | auxin-responsive protein SAUR41                             |
| 29 | LOC103633012 | up   | Environmental adaptation | Plant-pathogen interaction        | calcium-dependent protein kinase 22                         |
| 30 | LOC103633058 | down | Signal transduction      | Plant hormone signal transduction | transcription factor PHYTOCHROME INTERACTING FACTOR-LIKE 13 |
| 31 | LOC103634871 | up   | Environmental adaptation | Circadian rhythm - plant          | transcription factor HY5                                    |
| 32 | LOC103636459 | down | Signal transduction      | Plant hormone signal transduction | transcription factor LG2-like                               |
| 33 | LOC103638645 | up   | Environmental adaptation | Circadian rhythm - plant          | transcription factor HY5                                    |
| 34 | LOC103641361 | up   | Signal transduction      | Plant hormone signal transduction | transcription factor APG                                    |
|    |              |      | Environmental adaptation | Circadian rhythm – plant          |                                                             |
| 35 | LOC103642058 | down | Signal transduction      | Plant hormone signal transduction | Auxin-responsive protein SAUR71                             |
| 36 | LOC103646211 | up   | Signal transduction      | Plant hormone signal transduction | auxin-induced protein X10A                                  |
| 37 | LOC103646787 | up   | Signal transduction      | Plant hormone signal transduction | probable protein phosphatase 2C 37                          |
|    |              |      |                          | MAPK signaling pathway - plant    |                                                             |

|    |                |      |                          |                                                                           |                                                                  |
|----|----------------|------|--------------------------|---------------------------------------------------------------------------|------------------------------------------------------------------|
| 38 | LOC103648032   | up   | Signal transduction      | Plant hormone signal transduction                                         | probable indole-3-acetic acid-amido synthetase GH3.13            |
| 39 | LOC103652527   | up   | Signal transduction      | MAPK signaling pathway - plant                                            | mitogen-activated protein kinase kinase kinase 18                |
| 40 | LOC103654889   | down | Signal transduction      | Plant hormone signal transduction                                         | Auxin-responsive protein SAUR71                                  |
| 41 | LOC107326007   | up   | Signal transduction      | MAPK signaling pathway - plant                                            | Uncharacterized                                                  |
| 42 | LOC107403167   | up   | Signal transduction      | MAPK signaling pathway - plant                                            | Uncharacterized                                                  |
| 43 | LOC542189      | up   | Environmental adaptation | Plant-pathogen interaction                                                | salt-inducible putative protein serine/threonine/tyrosine kinase |
| 44 | pco069505(751) | up   | Signal transduction      | Plant hormone signal transduction                                         | snrkl11; Serine/threonine-protein kinase SRK2C                   |
| 45 | pco123854      | up   | Signal transduction      | Plant hormone signal transduction                                         | Auxin response factor                                            |
| 46 | pco153543(105) | down | Environmental adaptation | Protein processing in endoplasmic reticulum<br>Plant-pathogen interaction | HSP90-2; HSP protein                                             |
| 47 | PP2C14         | up   | Signal transduction      | Plant hormone signal transduction<br>MAPK signaling pathway - plant       | Uncharacterized                                                  |
| 48 | TIDP2950       | up   | Environmental adaptation | Plant-pathogen interaction                                                | Putative calcium-binding protein CML25                           |
| 49 | umc1534        | up   | Signal transduction      | Plant hormone signal transduction                                         | Auxin-responsive protein                                         |
| 50 | ZCN16          | up   | Environmental adaptation | Circadian rhythm - plant                                                  | ZCN16 protein                                                    |
| 51 | ZCN18          | up   | Environmental adaptation | Circadian rhythm - plant                                                  | ZCN18 protein                                                    |
| 52 | ZCN19          | up   | Environmental adaptation | Circadian rhythm - plant                                                  | ZCN19 protein                                                    |
| 53 | ZCN25          | up   | Environmental adaptation | Circadian rhythm - plant                                                  | ZCN25 protein                                                    |
