# Supplementary material for: Transcriptome and Metabolomic Analyses Reveal Regulatory Networks Controlling Maize Stomatal Development in Response to Blue Light
Source: Int J Mol Sci. 2021 May 20;22(10):5393. doi: 10.3390/ijms22105393 (PMC8161096; doi:10.3390/ijms22105393)
Supplement: Supplementary file 1 [file ijms-22-05393-s001.zip]

Archive with 6 entries (6 files):
- Figure S1.tif
- Figure S2.tif
- Table S1 summary of transcriptome analysis library.pdf
- Table S2 list of KEGG classification of level 2 of the 55 DEGs.pdf
- Table S3. List of KEGG classification of of 28 genes.pdf
- Table S4 seq for primers in qPCR.pdf
